# Supplementary material for: Decoupling the PBL Height, the Mixing Layer Height, and the Aerosol Layer Top in LiDAR Measurements over Chiang Mai, Northern Thailand
Source: Copernicus journal article supplement (doi:10.5194/egusphere-2025-630), 2025-02-27
Supplement: Supplementary file [file egusphere-2025-630-AC2-supplement.pdf]

We sincerely thank Reviewer #2 for the thoughtful and constructive comments, which have greatly improved the clarity, accuracy, and scientific rigor of our manuscript. Below, we provide point-by-point responses and describe the corresponding revisions.

---

## Overall Comment

### Reviewer:

The methodology... is innovative... However, the manuscript lacks sufficient detail regarding the proposed method and its applicability under varying atmospheric conditions... Figures require improvement...

### Response:

We appreciate the recognition of the methodological innovation. To address your concerns:

- We have **substantially expanded the Methods section** (lines 95–115) to provide a clearer explanation of the dynamic Maximum Analysis Altitude (MAA) method, its **physical basis**, and how it improves upon traditional fixed-altitude techniques (see also Author Response to Reviewer #1, Point #2):

The dynamic maximum analysis altitude (MAA) method introduced in this study is grounded in boundary layer thermodynamics and turbulence theory. It addresses a key limitation in conventional planetary boundary layer (PBL) detection approaches – namely, the use of a fixed maximum altitude for analysis regardless of prevailing atmospheric conditions. By leveraging real-time surface temperature variations, this method introduces a thermodynamically responsive upper boundary for LiDAR-based boundary layer retrievals. The physical rationale stems from the well-established relationship between surface heating, buoyant turbulence generation, and boundary layer growth. Under convective conditions, surface warming leads to rising thermals that entrain air and deepen the boundary layer ([Stull, 1988](#)). Conversely, cooler surface temperatures typically indicate stable stratification or residual layer conditions in the early morning or late evening ([Seibert et al., 2000](#)). These thermal variations strongly influence the height and structure of the PBL, as described in classic boundary layer turbulence models such as the Mixed Layer Model ([Tennekes, 1973](#); [Garratt, 1994](#)) and first-order closure turbulence schemes implemented in models like WRF-Chem ([Skamarock et al., 2008](#)). This dynamic parameter, unlike the fixed altitudes used in conventional methods, is calculated using Equation (1):

$$MAA(t) = LAA + (HAA - LAA) \left( \frac{T(t) - \min(T)}{\max[T - \min(T)]} \right) \quad (1)$$

where  $MAA(t)$  is the time-varying surface temperature-based maximum analysis altitude

LAA and HAA, represent the lowest and highest allowable maximum analysis altitudes. These are set to 0.5 and 2.5 km, respectively, based on [Solanki et al., 2019](#)

$T(t)$  is the observed surface temperature (in °C)

$\min(T)$  is the minimum temperature of the day (or the previous day for operational use)

$\max[ ]$  is the maximum of the expression inside the brackets

$t$  is time, representing temporal variation for all  $T$ , with data recorded every 5 minutes. The normalization ensures that MAA is low under cooler conditions (e.g., early morning residual layer regimes) and higher under warmer, convectively unstable conditions typical of late morning and afternoon boundary layer growth. This dynamic framework enhances robustness when detecting the PBL top using the Haar wavelet covariance transform (WCT) method ([Brooks, 2003](#)), as implemented in the [Ceilometer Layer Identification and Optimization \(Ceilo\) code](#). Following the WCT detection, a 6-hour moving average is applied to the raw PBL height time series to suppress high-frequency variability associated with short-lived turbulence bursts or instrumental noise. The resulting PBL height estimates are subsequently validated against radiosonde measurements and WRF-Chem model outputs to assess performance and reproducibility. This methodology contributes to a growing body of literature advocating adaptive and physically-informed PBL detection methods ([Hennemuth & Lammert, 2006](#)), particularly under complex aerosol and meteorological regimes like those encountered in Southeast Asia.

- The applicability of the method under varying conditions, including **cloudy skies, nighttime, and aerosol stratification**, is now better highlighted in Section 3, with revised explanations and updated captions (lines 140–150):

Figure 1 shows the NRB signal as a colored curtain plot, where the aerosol layer top (ALT) is marked as a white line, the time-varying maximum analysis altitude (MAA) as a gray line, and the refined PBL estimate as a red line. It is important to note that the MAA does not represent the PBL height, but rather defines the

maximum vertical range within which the wavelet covariance transform (WCT) analysis is conducted to detect the PBL height. For instance, if the MAA is set at 2.5 km AGL, the WCT algorithm only searches for the PBL height below that altitude. This adaptive constraint prevents overestimation of the PBL height, particularly during nighttime or during the growth and decay phases of the boundary layer. The MAA is defined dynamically and follows the diurnal variation of surface temperature, providing a physically realistic ceiling for analysis that adjusts with expected atmospheric mixing.

During 00:00–06:00 LT, conventional PBL detection methods often mischaracterize the PBL height by incorrectly identifying the residual layer top or aerosol layer top as the PBL. However, during the well-mixed part of the day and under cloud-free conditions (12:00–16:00 LT on January 27), the red PBL line closely aligns with the white ALT line. This alignment indicates a well-defined mixing layer, allowing for an accurate determination of the mixing layer height (MLH).

Under partly cloudy conditions (such as on January 28 during the afternoon between 12:00–16:00 LT), conventional algorithms misclassify the cloud base as the PBL height. In contrast, the refined red PBL line successfully separates from the white ALT line and follows the expected diurnal development, demonstrating improved reliability in characterizing the boundary layer, especially in aerosol-rich and meteorologically complex environments.

Transitional periods, such as the morning PBL growth phase (06:00–12:00) and evening decay (16:00–00:00), pose challenges due to aerosol accumulation in residual layers, which creates ambiguous gradients in the NRB signal. By incorporating the novel time-varying MAA and refining the PBL estimates, these limitations are mitigated.

- Figures 1–3 have been **improved in resolution and readability**, with enhanced axis labels and clearer subplot annotations as described in our response to Reviewer #1, Point #5.

---

## Specific Comments

## 1. Title Revision:

The term "decoupling" might be misunderstood...

### Response:

We agree that the term "decoupling" may suggest aerosol layer separation rather than layer distinction. The revised title is now:

### **“Temperature-Constrained LiDAR Retrieval of Planetary Boundary Layer Height over Chiang Mai, Thailand”**

This emphasizes the core innovation—PBL retrieval using a dynamic thermodynamic method—while avoiding potential misinterpretation.

---

## 2. Abstract Clarity:

(1) Highlight the new method; (2) Explain how it differs from earlier work.

### Response:

We revised the abstract to explicitly highlight the novelty of the dynamic MAA method and how it differs from traditional Haar WCT approaches (lines 20–30), with supporting citations and clearer explanation of methodological improvements over past studies:

**Accurate determination of the planetary boundary layer (PBL) height, mixing layer height (MLH), and aerosol layer top (ALT) is essential for air quality and climate studies, particularly in regions with complex aerosol dynamics such as Chiang Mai, northern Thailand. This study introduces a novel LiDAR-based retrieval method that integrates a temperature-dependent, dynamic maximum analysis altitude (MAA) into the traditional Haar Wavelet Covariance Transform (WCT) framework. Unlike conventional fixed-altitude WCT approaches, which often misclassify the ALT as the PBL—especially under stable nighttime or transitional conditions—this dynamic approach adapts the vertical search range for PBL detection in real time using observed surface temperature variations. The method is physically grounded in boundary layer thermodynamics, allowing for more accurate identification of the true PBL top while reducing contamination from residual aerosol layers and low clouds. Validation against radiosonde observations and comparison with previously validated WRF-Chem simulations demonstrate strong agreement, with the LiDAR-derived PBL heights capturing diurnal variations more reliably than traditional methods. The findings also reveal model biases during high aerosol events, highlighting the need for improved aerosol–meteorology coupling in mesoscale models. This integrated retrieval framework represents a significant advancement in LiDAR-based boundary layer detection and offers a robust tool for**

enhancing pollutant dispersion analysis, air quality forecasting, and climate modeling across aerosol-rich regions in Southeast Asia.

---

### 3. Methodological Detail:

Provide clearer retrieval method explanation.

#### **Response:**

Details of the retrieval method, including the MAA calculation (Eq. 1), Haar WCT implementation, and moving average smoothing, have been expanded (lines 95–115). We have also added the physical motivation for temperature-based MAA (Author Response to Reviewer #1, Point #2):

The dynamic maximum analysis altitude (MAA) method introduced in this study is grounded in boundary layer thermodynamics and turbulence theory. It addresses a key limitation in conventional planetary boundary layer (PBL) detection approaches – namely, the use of a fixed maximum altitude for analysis regardless of prevailing atmospheric conditions. By leveraging real-time surface temperature variations, this method introduces a thermodynamically responsive upper boundary for LiDAR-based boundary layer retrievals. The physical rationale stems from the well-established relationship between surface heating, buoyant turbulence generation, and boundary layer growth. Under convective conditions, surface warming leads to rising thermals that entrain air and deepen the boundary layer ([Stull, 1988](#)). Conversely, cooler surface temperatures typically indicate stable stratification or residual layer conditions in the early morning or late evening ([Seibert et al., 2000](#)). These thermal variations strongly influence the height and structure of the PBL, as described in classic boundary layer turbulence models such as the Mixed Layer Model ([Tennekes, 1973](#); [Garratt, 1994](#)) and first-order closure turbulence schemes implemented in models like WRF-Chem ([Skamarock et al., 2008](#)). This dynamic parameter, unlike the fixed altitudes used in conventional methods, is calculated using Equation (1):

$$MAA(t) = LAA + (HAA - LAA) \left( \frac{T(t) - \min(T)}{\max[T - \min(T)]} \right) \quad (1)$$

where  $MAA(t)$  is the time-varying surface temperature-based maximum analysis altitude

LAA and HAA, represent the lowest and highest allowable maximum analysis altitudes. These are set to 0.5 and 2.5 km, respectively, based on [Solanki et al., 2019](#)

**$T(t)$**  is the observed surface temperature (in °C)  
 **$\min(T)$**  is the minimum temperature of the day (or the previous day for operational use)  
 **$\max[ ]$**  is the maximum of the expression inside the brackets

$t$  is time, representing temporal variation for all  $T$ , with data recorded every 5 minutes. The normalization ensures that MAA is low under cooler conditions (e.g., early morning residual layer regimes) and higher under warmer, convectively unstable conditions typical of late morning and afternoon boundary layer growth. This dynamic framework enhances robustness when detecting the PBL top using the Haar wavelet covariance transform (WCT) method ([Brooks, 2003](#)), as implemented in the [Ceilometer Layer Identification and Optimization \(Ceilo\) code](#). Following the WCT detection, a 6-hour moving average is applied to the raw PBL height time series to suppress high-frequency variability associated with short-lived turbulence bursts or instrumental noise. The resulting PBL height estimates are subsequently validated against radiosonde measurements and WRF-Chem model outputs to assess performance and reproducibility. This methodology contributes to a growing body of literature advocating adaptive and physically-informed PBL detection methods ([Hennemuth & Lammert, 2006](#)), particularly under complex aerosol and meteorological regimes like those encountered in Southeast Asia.

---

#### 4. Height Parameters (Lines 99–100):

0.5 and 2.5 km are used, but radiosondes go only to 2 km.

##### **Response:**

We clarified that while radiosonde interpolation was limited to 2 km for consistency with LiDAR overlap regions, the MAA parameter allows detection up to 2.5 km, ensuring that convective boundary layers on warm days are not artificially truncated. This distinction has been added in the Methods section:

Data from radiosondes launched by the Thai Meteorological Department (TMD) at the Chiang Mai International Airport (18.77° N, 98.96° E, 311 mASL; approximately 9 km in distance from the study site) were retrieved from the University of Wyoming's atmospheric sounding archive (<https://weather.uwyo.edu/upperair/sounding.html>). These data were interpolated to a vertical grid with 30-meter spacing from 100 m to 2 km, corresponding to the LiDAR minimum detection height or overlap region and the

typical aerosol layer top ([Solanki et al., 2019](#)), respectively. **Although the radiosonde data were interpolated only up to 2 km for consistency with the LiDAR's effective detection range and overlap region, the dynamic maximum analysis altitude (MAA) used in our retrieval method was permitted to extend up to 2.5 km. This was done to allow for the detection of elevated convective boundary layers on warm days, which may rise above 2 km, as observed in prior studies (e.g., Solanki et al., 2019). Thus, the MAA range (0.5–2.5 km) enables flexible detection without being constrained by the radiosonde's upper limit, while validation comparisons remain within the common 2 km vertical range.**

---

#### 5. Line 122 – “Overlapping time periods”:

Avoid ambiguity; clarify terminology.

##### **Response:**

We now specify that "overlapping time periods" refers to **forecast output windows used for averaging model output to align with LiDAR data timestamps**, not to LiDAR overlap corrections. The text has been updated accordingly (line 122):

**The simulations used in this study were run in forecast mode to reflect real operational conditions, with model output averaged over overlapping time periods in the forecast cycle to align with LiDAR data timestamps. Here, "overlapping time periods" refers specifically to the temporal matching between forecast outputs and observational sampling windows, and not to overlap correction in the LiDAR signal. WRF-Chem simulations were configured and optimized for mainland Southeast Asia ([Bran et al., 2024](#)) using version 4.3.3, with the Mellor-Yamada Nakanishi and Niino (MYNN) Level 3 PBL scheme ([Olson et al., 2019](#)). The simulations incorporated...**

---

#### 6. PBL Retrieval Description (Lines 106+):

Details on dynamic MAA, WCT, and moving average not clearly described.

##### **Response:**

We agree and have elaborated the steps:

- MAA(t) computation using normalized temperature scale.

- Application of Haar WCT (Brooks, 2003) within MAA constraint.
- Post-processing with a 6-hour moving average to reduce high-frequency variability.

This is now clearly described in lines 95–115, and expanded in our response to Reviewer #1, Point #2:

The dynamic maximum analysis altitude (MAA) method introduced in this study is grounded in boundary layer thermodynamics and turbulence theory. It addresses a key limitation in conventional planetary boundary layer (PBL) detection approaches – namely, the use of a fixed maximum altitude for analysis regardless of prevailing atmospheric conditions. By leveraging real-time surface temperature variations, this method introduces a thermodynamically responsive upper boundary for LiDAR-based boundary layer retrievals. The physical rationale stems from the well-established relationship between surface heating, buoyant turbulence generation, and boundary layer growth. Under convective conditions, surface warming leads to rising thermals that entrain air and deepen the boundary layer ([Stull, 1988](#)). Conversely, cooler surface temperatures typically indicate stable stratification or residual layer conditions in the early morning or late evening ([Seibert et al., 2000](#)). These thermal variations strongly influence the height and structure of the PBL, as described in classic boundary layer turbulence models such as the Mixed Layer Model ([Tennekes, 1973](#); [Garratt, 1994](#)) and first-order closure turbulence schemes implemented in models like WRF-Chem ([Skamarock et al., 2008](#)). This dynamic parameter, unlike the fixed altitudes used in conventional methods, is calculated using Equation (1):

$$MAA(t) = LAA + (HAA - LAA) \left( \frac{T(t) - \min(T)}{\max[T - \min(T)]} \right) \quad (1)$$

where  $MAA(t)$  is the time-varying surface temperature-based maximum analysis altitude

LAA and HAA, represent the lowest and highest allowable maximum analysis altitudes. These are set to 0.5 and 2.5 km, respectively, based on [Solanki et al., 2019](#)

$T(t)$  is the observed surface temperature (in °C)

$\min(T)$  is the minimum temperature of the day (or the previous day for operational use)

$\max[ ]$  is the maximum of the expression inside the brackets



$t$  is time, representing temporal variation for all  $T$ , with data recorded every 5 minutes. The normalization ensures that MAA is low under cooler conditions (e.g., early morning residual layer regimes) and higher under warmer, convectively unstable conditions typical of late morning and afternoon boundary layer growth. This dynamic framework enhances robustness when detecting the PBL top using the Haar wavelet covariance transform (WCT) method ([Brooks, 2003](#)), as implemented in the [Ceilometer Layer Identification and Optimization \(Ceilo\) code](#). Following the WCT detection, a 6-hour moving average is applied to the raw PBL height time series to suppress high-frequency variability associated with short-lived turbulence bursts or instrumental noise. The resulting PBL height estimates are subsequently validated against radiosonde measurements and WRF-Chem model outputs to assess performance and reproducibility. This methodology contributes to a growing body of literature advocating adaptive and physically-informed PBL detection methods ([Hennemuth & Lammert, 2006](#)), particularly under complex aerosol and meteorological regimes like those encountered in Southeast Asia.

---

#### 7. LiDAR Instrumentation Details:

Instrument not described.

#### Response:

We now provide detailed specifications of the MiniMPL system, including vertical resolution, pulse repetition rate, averaging time, and operational deployment at the study site (line 85 and Author Response to Reviewer #1, Point #1):

The study was conducted at the headquarters of the National Astronomical Research Institute of Thailand (NARIT), situated at the Princess Sirindhorn AstroPark in Chiang Mai, northern Thailand (18.85° N, 98.96° E, 332 mASL), a region known for its complex aerosol dynamics driven by mountainous topography, biomass burning (forest and agricultural fires), anthropogenic pollution, and biogenic emissions from forested areas. The site experiences significant seasonal variations in aerosol concentrations, influencing the vertical distribution of particulate matter. To monitor these dynamics, a Mini Micro Pulse LiDAR (MiniMPL) system was deployed at the site and remained fixed throughout the measurement campaign to ensure spatial consistency. The instrument operated at a pulse repetition frequency of 2500 Hz, with each vertical profile averaged over 30 seconds. For analysis, the data were grouped into 5-minute intervals to balance temporal resolution with noise reduction, in line with standard practices in boundary layer studies, including those at this site ([Solanki et al., 2019](#)). The LiDAR

was continuously pointed at the zenith, ensuring consistent spatiotemporal overlap for robust monitoring of the vertical aerosol structure and planetary boundary layer (PBL) evolution. The study period, from December 2023 to February 2024, coincides with the beginning of the dry season in northern Thailand, when agricultural and forest fires begin to elevate aerosol concentrations ([Bran et al., 2024](#)), complicating the identification of the PBL and aerosol layers. This period provides a unique opportunity to evaluate the performance of the proposed LiDAR-based approach under high aerosol loading and variable meteorological conditions. A more comprehensive description of the study site is given in [Solanki et al., 2019](#).

---

#### 8. Radiosonde Validation Limitation:

Only 07:00 validation; suggest UAVs or more data.

##### **Response:**

We acknowledge this limitation (lines 115 and 230) and now **explicitly state** that the single daily radiosonde launch limits diurnal validation. We also mention a forthcoming study using aircraft data over Chiang Mai (April 2025) that validates the method under different atmospheric conditions (Author Response to Reviewer #1, Point #6):

**However, a significant limitation is that the radiosondes were launched only once daily at 07:00 local time (00 UTC), coinciding with the early morning minimum PBL height. This constraint—stemming from the operational limitations of the Thai Meteorological Department—means that diurnal variations in the PBL height, especially during its daytime growth and decay phases, cannot be captured, potentially reducing the representativeness of radiosonde-derived estimates for broader atmospheric analyses. To address this limitation, future studies should incorporate higher temporal resolution datasets—such as those obtained from unmanned aerial vehicles (UAVs)—which can capture the full diurnal evolution of the boundary layer. Recent studies (e.g., Shen et al., 2023) have demonstrated the utility of UAV-based profiling for validating LiDAR-derived PBL heights under complex atmospheric conditions. Integrating UAV observations will strengthen validation and improve confidence in the performance of the proposed retrieval method across a wider range of temporal and meteorological regimes.**

Shen, L., Zhang, J., Cheng, Y., Lu, X., Dai, H., Wu, D., Chen, D.-R., Liu, J., and Gui, H.: Characterization of the vertical evolution of urban nocturnal boundary layer by UAV

measurements: Insights into relations to cloud radiative effect, *Environ. Res.*, 232, 116323, <https://doi.org/10.1016/j.envres.2023.116323>, 2023.

---

#### 9. WRF-Chem Model Details:

Please provide more detail.

##### **Response:**

We expanded our description of WRF-Chem configuration in the Methodology section (lines 120–135), including emission sources, boundary conditions, and model resolution. We also emphasize that this configuration has been previously validated for northern Thailand (Author Response to Reviewer #1, Point #7):

**WRF-Chem simulations were configured and optimized for mainland Southeast Asia (Bran et al., 2024) using version 4.3.3, with the Mellor-Yamada Nakanishi and Niino (MYNN) Level 3 PBL scheme (Olson et al., 2019). The simulations incorporated updated terrestrial data (Manomaiphiboon et al., 2017), anthropogenic emissions for northern Thailand (Jansakoo et al., 2019), and biogenic and fire emissions from MEGAN (Guenther et al., 2006) and FINNV1.5 (Wiedinmyer et al., 2011). To project fire emissions into the future (forecast mode), the assumption of persistent fire emissions was applied (Kumar et al., 2020). Initial and boundary conditions for meteorology and chemistry were derived from GFS (NCEP, 2024) and CESM2-WACCM (Gettelman et al., 2019), respectively. The horizontal spatial resolution used in the WRF-Chem simulation was 9-km covering mainland Southeast Asia. Since WRF-Chem uses a hybrid, sigma-pressure, terrain-following coordinate system, the vertical resolution used in this study with 38 vertical levels varies with altitude. Near the surface (0 to ~1,100 meters AGL; 24 vertical levels), it ranges from about 45–50 meters, increasing to approximately 70–250 meters in the lower troposphere (~1,100 to 2,000 meters AGL; 4 vertical levels). From the aerosol layer top to the mid troposphere (~2,000 to 7,000 meters AGL; 4 vertical levels), the resolution becomes coarser, ranging from 500 to 2,000 meters, and further coarsens to over 2,000 meters from the mid to the upper troposphere and stratosphere (~7,000 to 20,000 meters AGL; 6 vertical levels), with finer resolution near the surface to capture smaller-scale processes and coarser resolution at higher altitudes where larger-scale dynamics dominate. The WRF-Chem simulations used in this study have been previously validated under similar regional conditions in northern Thailand. Prior work has demonstrated the model's reliability in capturing key atmospheric dynamics, including surface PM<sub>2.5</sub> distributions, optical turbulence, and boundary layer processes. Notably, the model has been successfully**

applied in the following studies: [Bran et al. \(2022\)](#), [Macatangay et al. \(2024\)](#), and [Bran et al. \(2024\)](#). These validations support the robustness of WRF-Chem for use as a benchmark in our comparison with LiDAR-derived PBL heights.

---

#### 10. Figure Clarifications:

- **Figure 1:** We appreciate the reviewer's attention to detail. We would like to clarify that the time series in Figure 1(a) actually spans **more than 48 hours**, covering the period from **00:00 local time on January 27 to 07:00 local time on January 29, 2024**.
  - **Figure 2:** Improved resolution, enlarged axis labels, and annotated subplots (a)–(c).
  - **Figure 3:** Now split into three panels (a–c) for each month with clear axes, correlation coefficients, and RMSE values. All revisions follow suggestions in Reviewer #1 Point #5.
- 

#### Minor Comments

- "Aerosol-radiation interaction" revised to "**aerosol–meteorology interaction**" throughout.
- Line 36: Changed "climate dynamics" to "**weather dynamics**".
- Line 72: Changed "climate model" to "**mesoscale meteorological model**".
- Line 150: We restructured the paragraphs to properly refer to the morning (06:00–12:00) and evening (16:00–00:00) transitions:

**During 00:00–06:00 LT, conventional PBL detection methods often mischaracterize the PBL height by incorrectly identifying the residual layer top or aerosol layer top as the PBL. However, during the well-mixed part of the day and under cloud-free conditions (12:00–16:00 LT on January 27), the red PBL line closely aligns with the white ALT line. This alignment indicates a well-defined mixing layer, allowing for an accurate determination of the mixing layer height (MLH).**

**Transitional periods, such as the morning PBL growth phase (06:00–12:00) and evening decay (16:00–00:00), pose challenges due to aerosol accumulation in residual layers, which creates ambiguous gradients in the NRB signal. By**

incorporating the novel time-varying MAA and refining the PBL estimates, these limitations are mitigated.

Under partly cloudy conditions (such as on January 28 during the afternoon between 12:00–16:00 LT), conventional algorithms misclassify the cloud base as the PBL height. In contrast, the refined red PBL line successfully separates from the white ALT line and follows the expected diurnal development, demonstrating improved reliability in characterizing the boundary layer, especially in aerosol-rich and meteorologically complex environments.

- Lines 190–191: We revised the speculative statement on aerosol-radiation interaction to include references and caveats (Du et al., 2020; Petäjä et al., 2016), as suggested:

Figure 3 compares PBL height estimates from LiDAR retrievals (red line) and WRF-Chem forecasts (black line) for December 2023, January 2024, and February 2024 at NARIT AstroPark in Chiang Mai, northern Thailand. While the WRF-Chem model generally captures seasonal and diurnal variations in PBL height, it tends to overestimate daytime PBL heights during periods of elevated aerosol loading. **This behavior persisted across simulations using different PBL parameterizations (e.g., MYNN2.5, MYNN3, and YSU) and varied fire and anthropogenic emission inputs, suggesting a consistent model response to aerosol–meteorology coupling. The overestimation likely stems from limitations in how current model configurations, particularly those using the MYNN Level 3 scheme, represent aerosol–meteorology–radiation interactions and their feedbacks on turbulence generation and vertical mixing (Du et al., 2020; Petäjä et al., 2016).** Correlation coefficients ( $r = 0.85, 0.86, \text{ and } 0.81$  for December, January, and February, respectively) indicate strong agreement between LiDAR retrievals and model outputs. However, the root mean square error (RMSE) and percentage RMSE (%RMSE) increased from December (0.28 km, 21%) to February (0.46 km, 33%), coinciding with peak fire activity. This degradation in model performance further supports the hypothesis that persistent fire emissions amplify the aerosol burden, modifying radiative transfer and boundary layer stability in ways that are not fully captured by current parameterizations (Kumar et al., 2020). These findings underscore the need to refine PBL schemes and improve aerosol–radiation feedback representation in regional models operating under high aerosol loading conditions.

---

We sincerely thank Reviewer #2 again for the valuable feedback. The manuscript has been substantially improved in response to your comments.

For reference, here is also the responses to reviewer #1:

**Author Responses on “Decoupling the PBL Height, the Mixing Layer Height, and the Aerosol Layer Top in LiDAR Measurements over Chiang Mai, Northern Thailand”**

Thank you for your comprehensive and insightful feedback. We appreciate the opportunity to clarify and strengthen our manuscript. Below are our responses to each point:

1. **Dataset Description:** We acknowledge that a detailed description of our LiDAR datasets was insufficient. The LiDAR measurements were collected continuously over the study period (December 2023 – February 2024) with a vertical resolution of 30 meters. The instrument operated at a pulse frequency of 2500 Hz, with each profile having an averaging time of 30 seconds while being pointed at the same position in the sky—providing consistent spatiotemporal overlap. Each MiniMPL LiDAR profile was averaged over 30 seconds, and the data were grouped at 5-minute intervals for analysis. This approach aligns with standard practice in boundary layer studies and helps balance temporal resolution with noise reduction, as demonstrated in similar studies, including Solanki et al. (2019). The spatial coverage was centered at NARIT AstroPark in Chiang Mai, northern Thailand, with the instrument fixed at this location to ensure spatial consistency. There was significant temporal overlap in the data, allowing continuous monitoring and analysis of boundary layer variations. A full site description can be found in Solanki et al. (2019), which is already referenced in line 90: "A more comprehensive description of the study site is given in Solanki et al., 2019." This information will be added to the paragraph in line 85 as:

The study was conducted at the headquarters of the National Astronomical Research Institute of Thailand (NARIT), situated at the Princess Sirindhorn AstroPark in Chiang Mai, northern Thailand (18.85° N, 98.96° E, 332 mASL), a region known for its complex aerosol dynamics driven by mountainous topography, biomass burning (forest and agricultural fires), anthropogenic pollution, and biogenic emissions from forested areas. The site experiences significant seasonal variations in aerosol concentrations, influencing the vertical

distribution of particulate matter. To monitor these dynamics, a Mini Micro Pulse LiDAR (MiniMPL) system was deployed at the site and remained fixed throughout the measurement campaign to ensure spatial consistency. The instrument operated at a pulse repetition frequency of 2500 Hz, with each vertical profile averaged over 30 seconds. For analysis, the data were grouped into 5-minute intervals to balance temporal resolution with noise reduction, in line with standard practices in boundary layer studies, including those at this site (Solanki et al., 2019). The LiDAR was continuously pointed at the zenith, ensuring consistent spatiotemporal overlap for robust monitoring of the vertical aerosol structure and planetary boundary layer (PBL) evolution. The study period, from December 2023 to February 2024, coincides with the beginning of the dry season in northern Thailand, when agricultural and forest fires begin to elevate aerosol concentrations (Bran et al., 2024), complicating the identification of the PBL and aerosol layers. This period provides a unique opportunity to evaluate the performance of the proposed LiDAR-based approach under high aerosol loading and variable meteorological conditions. A more comprehensive description of the study site is given in Solanki et al., 2019.

2. **Physical Basis of MAA Method:** The MAA method is fundamentally grounded in the principle that surface temperature variations reflect thermodynamic conditions influencing atmospheric stability and boundary layer development. By dynamically adjusting the maximum analysis altitude based on surface temperature and its derivatives, the method accounts for thermally-driven boundary layer growth and residual layer stratification. The physical assumption is that higher surface temperatures correlate with a convectively active boundary layer, guiding the adjustment of the detection altitude. We will add a dedicated subsection elaborating on these principles and referencing relevant theoretical frameworks, such as boundary layer turbulence models, to enhance clarity and reproducibility in the paragraph in line 95:

The dynamic maximum analysis altitude (MAA) method introduced in this study is grounded in boundary layer thermodynamics and turbulence theory. It

addresses a key limitation in conventional planetary boundary layer (PBL) detection approaches—namely, the use of a fixed maximum altitude for analysis regardless of prevailing atmospheric conditions. By leveraging real-time surface temperature variations, this method introduces a thermodynamically responsive upper boundary for LiDAR-based boundary layer retrievals. The physical rationale stems from the well-established relationship between surface heating, buoyant turbulence generation, and boundary layer growth. Under convective conditions, surface warming leads to rising thermals that entrain air and deepen the boundary layer (Stull, 1988). Conversely, cooler surface temperatures typically indicate stable stratification or residual layer conditions in the early morning or late evening (Seibert et al., 2000). These thermal variations strongly influence the height and structure of the PBL, as described in classic boundary layer turbulence models such as the **Mixed Layer Model** (Tennekes, 1973; Garratt, 1994) and **first-order closure turbulence schemes** implemented in models like WRF-Chem (Skamarock et al., 2008). This dynamic parameter, unlike the fixed altitudes used in conventional methods, is calculated using Equation (1):

$$MAA(t) = LAA + (HAA - LAA) \left( \frac{T(t) - \min(T)}{\max[T - \min(T)]} \right) \quad (1)$$

where  $MAA(t)$  is the time-varying surface temperature-based maximum analysis altitude

LAA and HAA, represent the lowest and highest allowable maximum analysis altitudes. These are set to 0.5 and 2.5 km, respectively, based on [Solanki et al., 2019](#)

$T(t)$  is the observed surface temperature (in °C)

$\min(T)$  is the minimum temperature of the day (or the previous day for operational use)

$\max[ ]$  is the maximum of the expression inside the brackets

$t$  is time, representing temporal variation for all  $T$ , with data recorded every 5 minutes. The normalization ensures that MAA is low under cooler conditions (e.g., early morning residual layer regimes) and higher under warmer, convectively unstable conditions typical of late morning and afternoon boundary layer growth. This dynamic framework enhances robustness when detecting the PBL top using the Haar wavelet covariance transform (WCT) method (Brooks, 2003), as



implemented in the Ceilometer Layer Identification and Optimization (Ceilo) code. Following the WCT detection, a 6-hour moving average is applied to the raw PBL height time series to suppress high-frequency variability associated with short-lived turbulence bursts or instrumental noise. The resulting PBL height estimates are subsequently validated against radiosonde measurements and WRF-Chem model outputs to assess performance and reproducibility. This methodology contributes to a growing body of literature advocating adaptive and physically-informed PBL detection methods (Hennemuth & Lammert, 2006), particularly under complex aerosol and meteorological regimes like those encountered in Southeast Asia.

#### **Key References:**

- Stull, R. B. (1988). *An Introduction to Boundary Layer Meteorology*. Springer. <https://doi.org/10.1007/978-94-009-3027-8>
- Garratt, J. R. (1994). *The Atmospheric Boundary Layer*. Cambridge University Press.
- Tennekes, H. (1973). A model for the dynamics of the inversion above a convective boundary layer. *Journal of the Atmospheric Sciences*, 30(4), 558–567. [https://doi.org/10.1175/1520-0469\(1973\)030<0558:AMFTDO>2.0.CO;2](https://doi.org/10.1175/1520-0469(1973)030<0558:AMFTDO>2.0.CO;2)
- Brooks, I. M. (2003). Finding boundary layer top: Application of wavelet covariance transform to lidar backscatter profiles. *Journal of Atmospheric and Oceanic Technology*, 20(8), 1092–1105. [https://doi.org/10.1175/1520-0426\(2003\)020<1092:FBLTAO>2.0.CO;2](https://doi.org/10.1175/1520-0426(2003)020<1092:FBLTAO>2.0.CO;2)
- Solanki, R., Macatangay, R., Sakulsupich, V., Sonkaew, T., & Mahapatra, P. S. (2019). Mixing Layer Height Retrievals From MiniMPL Measurements in the Chiang Mai Valley: Implications for Particulate Matter Pollution. *Frontiers in Earth Science*, 7, 308. <https://doi.org/10.3389/feart.2019.00308>
- Skamarock, W. C., et al. (2008). A Description of the Advanced Research WRF Version 3. *NCAR Technical Note NCAR/TN-475+STR*. <https://doi.org/10.5065/D68S4MVH>
- Hennemuth, B., & Lammert, A. (2006). Determination of the atmospheric boundary layer height from radiosonde and lidar backscatter. *Boundary-Layer*

3. **Choice of Radiosonde Method:** We thank the reviewer for this insightful comment. The method proposed by Wang and Wang (2014) was chosen because it improves upon earlier approaches by integrating multiple meteorological variables—such as temperature, humidity, and cloud presence—into a unified framework for estimating the mixing layer height (MLH). Traditional methods often rely on a single variable, such as potential temperature gradients, specific humidity, or refractivity (e.g., Seibert et al., 2000; Liu and Liang, 2010; Zhang et al., 2010), which can lead to inconsistent or inaccurate PBL height estimates, particularly under complex atmospheric conditions. In contrast, the Wang and Wang method identifies the height at which sharp gradients in temperature and humidity align most consistently, taking into account the effects of cloud-capped layers and stable stratification. This integrative approach enhances the robustness of MLH estimates, especially during transition periods or in the presence of residual layers and variable moisture profiles—conditions common in our study region. As a result, it yields more reliable boundary layer estimates compared to single-variable or gradient-threshold methods. We have updated the manuscript (line 115) to include this rationale and added supporting citations as:

PBL heights were determined using the method of Wang and Wang (2014), which identifies the planetary boundary layer height by analyzing the first derivatives of key meteorological variables—specifically, temperature, wind speed, wind direction, potential temperature, dewpoint, and relative humidity. This approach considers both the maxima and minima in these gradients to detect significant atmospheric transitions associated with the top of the mixing layer. The final PBL height was computed as the average of the estimates derived from these parameters. This method was selected over traditional single-variable approaches because it integrates multiple physical parameters and accounts for cloud presence and stable stratification, providing more robust and consistent results under diverse atmospheric conditions. Earlier methods that rely solely on individual gradients (e.g., of potential temperature or humidity) are prone to inaccuracies, particularly in regions with residual layers, cloud-capped boundaries, or complex moisture profiles (Seibert et al., 2000; Liu and Liang, 2010). In contrast, the Wang and Wang method aligns discontinuities across multiple variables to better identify the true extent of turbulent mixing. Its integrative design makes it especially suitable for the complex atmospheric

dynamics observed in this study over northern Thailand. PBL heights were determined using the maxima in the first derivatives of temperature, wind speed, wind direction, and potential temperature, as well as the minima in the first derivatives of dewpoint and relative humidity (Wang and Wang, 2014). The PBL height was computed as the average of estimates derived from these parameters. However, a significant limitation is that the radiosondes were launched only once daily at 7 AM local time (00 UTC), coinciding with the early morning minimum PBL height. This limitation means that diurnal variations in the PBL height, especially during its daytime growth and decay phases, cannot be captured, potentially reducing the representativeness of radiosonde-derived estimates for broader atmospheric analyses.

**Suggested citations to add (with links):**

- Seibert, P., et al. (2000): *Review and intercomparison of operational methods for the determination of the mixing height*, Atmos. Environ., 34, 1001–1027. [https://doi.org/10.1016/S1352-2310\(99\)00349-0](https://doi.org/10.1016/S1352-2310(99)00349-0)
- Liu, S., & Liang, X. Z. (2010): *Observed diurnal cycle climatology of planetary boundary layer height*, J. Clim., 23(21), 5790–5809. <https://doi.org/10.1175/2010JCLI3552.1>

4. **Discrepancies in Figure 1 (January 27):** We thank the reviewer for their observation. We would like to clarify that the gray line labeled as the Maximum Analysis Altitude (MAA) in Figure 1 **does not represent the PBL height**. Rather, it defines the **maximum vertical extent** up to which the Wavelet Covariance Transform (WCT) algorithm is applied to detect the PBL height. In other words, if the MAA is at 2.5 km AGL (above ground level) at a particular time, the WCT analysis is limited to searching for the PBL height only up to that altitude. The MAA is defined dynamically and is designed to follow the expected range of the convective boundary layer, informed by the diurnal cycle of surface temperature. This prevents overestimation of the PBL height, especially during nighttime or during the transition phases of growth and decay. On January 27, between 12:00 and 18:00, surface heating resulted in an elevated MAA, which simply means the algorithm had permission to search for PBL heights up to those altitudes below the MAA—but this does not imply that the actual PBL reached those levels. The **actual refined PBL height**, depicted by the **red line**, stays well below the MAA throughout this period,

as expected. We have revised the figure caption and added a clarification in the main text to ensure that the distinction between MAA and PBL height is clearly understood (lines 140-150 ):

Figure 1 shows the NRB signal as a colored curtain plot, where the aerosol layer top (ALT) is marked as a white line, the time-varying maximum analysis altitude (MAA) as a gray line, and the refined PBL estimate as a red line. It is important to note that the MAA does **not represent the PBL height**, but rather defines the **maximum vertical range** within which the wavelet covariance transform (WCT) analysis is conducted to detect the PBL height. For instance, if the MAA is set at 2.5 km AGL, the WCT algorithm only searches for the PBL height below that altitude. This adaptive constraint prevents overestimation of the PBL height, particularly during nighttime or during the growth and decay phases of the boundary layer. The MAA is defined dynamically and follows the diurnal variation of surface temperature, providing a physically realistic ceiling for analysis that adjusts with expected atmospheric mixing. During 00:00–06:00 LT, conventional PBL detection methods often mischaracterize the PBL height by incorrectly identifying the residual layer top or aerosol layer top as the PBL. However, during the well-mixed part of the day and under cloud-free conditions (12:00–16:00 LT on January 27), the red PBL line closely aligns with the white ALT line. This alignment indicates a well-defined mixing layer, allowing for an accurate determination of the mixing layer height (MLH).

In contrast, under partly cloudy conditions (12:00–16:00 LT on January 28), conventional algorithms misclassify the cloud base as the PBL height. Transitional periods, such as the morning PBL growth phase (06:00–12:00) and evening decay (16:00–00:00), also pose challenges due to aerosol accumulation in residual layers, which creates ambiguous gradients in the NRB signal. By incorporating the novel time-varying MAA and refining the PBL estimates, these limitations are mitigated. The results demonstrate improved PBL detection, as seen during the well-mixed hours on January 28, where the refined red PBL line separates from the white ALT and follows the expected diurnal development.

This approach improves reliability in characterizing the boundary layer, especially in aerosol-rich and meteorologically complex environments.

**Figure 1.** The normalized relative backscatter (NRB) signal from the LiDAR is shown as a colored curtain plot, illustrating variations in aerosol number concentration over time. The aerosol layer top (ALT) is marked as a white line, the time-varying maximum analysis altitude (MAA) as a gray line, and the refined planetary boundary layer (PBL) estimate is shown in red. The MAA does **not represent the PBL height**; rather, it defines the maximum altitude (in km AGL) up to which the WCT algorithm is applied to detect the PBL height. The MAA is dynamically adjusted based on surface temperature to follow the expected diurnal evolution of the boundary layer and to avoid overestimating the PBL height, particularly during nighttime and transitional phases. Data shown here were collected on January 27–29, 2024.

5. **Figures Improvement:** We will improve the resolution of Figures 2 and 3 and enlarge the axes labels for better clarity. Additionally, we will add subplot labels (e.g., (a), (b), (c)) to facilitate reference within the main text as:

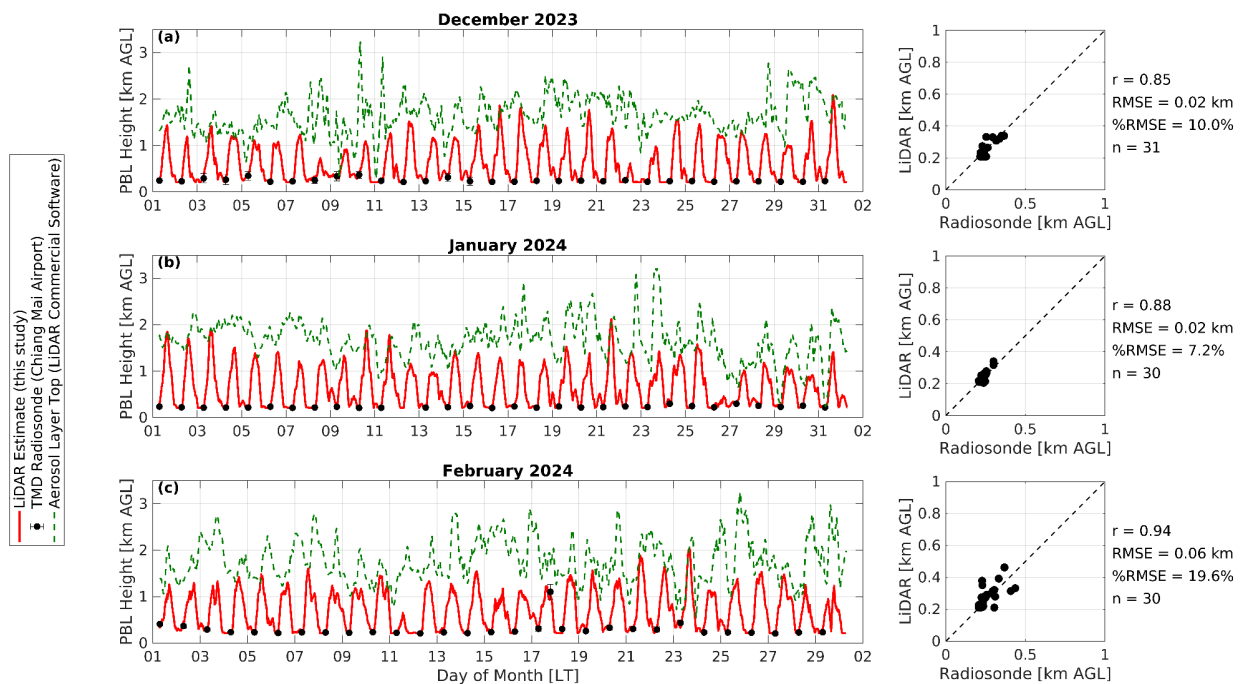

Figure 2. Comparison of planetary boundary layer (PBL) height estimates derived

from this study's LiDAR retrievals (red curve), TMD radiosonde measurements at Chiang Mai Airport (black points), and aerosol layer top (ALT) heights calculated using commercial LiDAR software (green dashed line) for (a) December 2023, (b) January 2024, and (c) February 2024 at NARIT AstroPark, Chiang Mai, northern Thailand. The right panels show the correlations between LiDAR-based PBL estimates and radiosonde-derived heights, with Pearson correlation coefficients ( $r$ -values) and %RMSEs ranging from 0.85 to 0.94 and 7.2% to 19.6%, respectively, for each month.

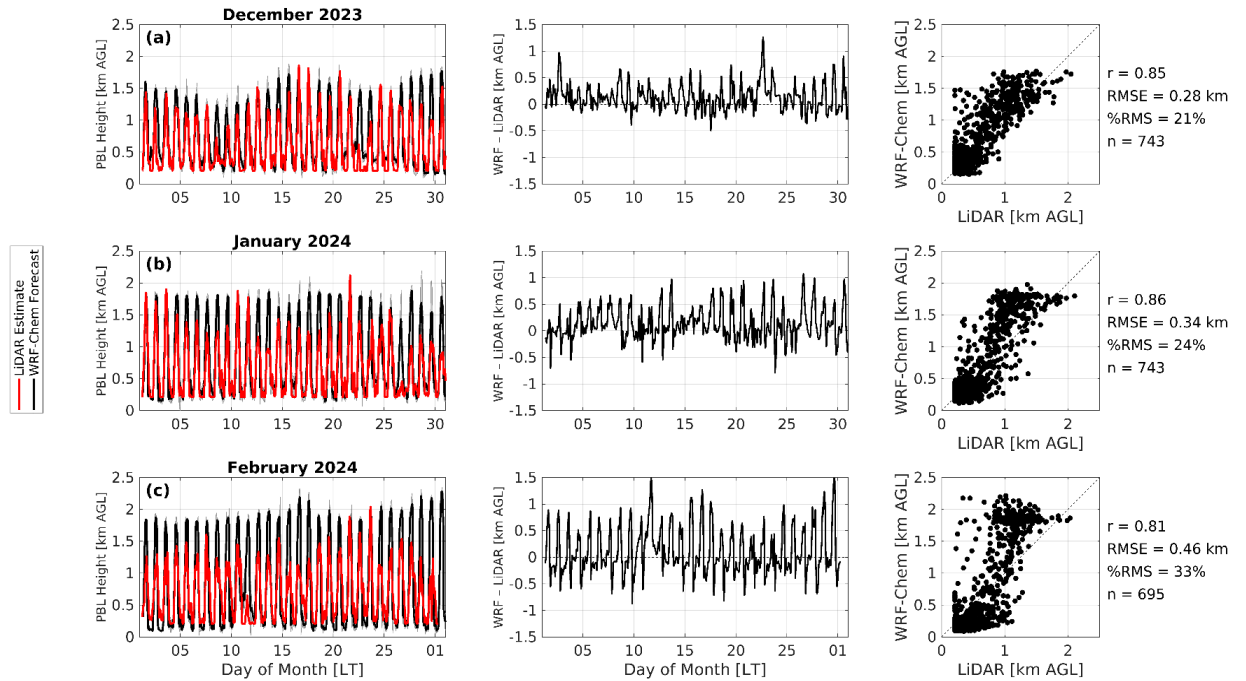

Figure 3. Comparison of planetary boundary layer (PBL) height estimates from LiDAR retrievals (red line) and WRF-Chem forecasts (black line) at NARIT AstroPark, Chiang Mai, Thailand, for (a) December 2023, (b) January 2024, and (c) February 2024 (left column). The middle column shows time series of differences between WRF-Chem and LiDAR estimates (WRF – LiDAR), while the right column presents scatter plots with correlation coefficients ( $r$ ), root mean square error (RMSE), percentage RMSE (%RMSE), and number of matched data points ( $n$ ). The WRF-Chem model configuration used in this comparison has been previously validated under similar regional conditions in northern Thailand, supporting its use as a reference for PBL height estimation.

6. **Radiosonde Validation at Multiple Times:** We agree that validation using radiosonde data limited to 07:00 local time provides only partial insight into the diurnal evolution of the planetary boundary layer (PBL). Unfortunately, the radiosonde launches are conducted by the Thai Meteorological Department, which, due to budgetary constraints, is currently limited to a single launch per day. This limitation has already been noted in the manuscript (line 115 and 230), but we can further clarify the text by explicitly stating:

*"However, a significant limitation is that the radiosondes were launched only once daily at 07:00 local time (00 UTC), coinciding with the early morning minimum PBL height. This constraint—stemming from the operational limitations of the Thai Meteorological Department—means that diurnal variations in the PBL height, especially during its daytime growth and decay phases, cannot be captured, potentially reducing the representativeness of radiosonde-derived estimates for broader atmospheric analyses."*

Additionally, we have recently validated our method using aircraft observations collected during a measurement campaign over Chiang Mai Airport in April 2025. While the results are promising, this new dataset lies outside the scope of the current paper and will be presented in a separate publication.

7. **Validation of WRF PBL Heights:** The WRF-Chem simulations used in our comparison have been previously validated under similar regional conditions in several studies, including:

- Bran, S. H., Macatangay, R., Chotamonsak, C., Chantara, S., & Surapipith, V. (2024). Understanding the seasonal dynamics of surface PM<sub>2.5</sub> mass distribution and source contributions over Thailand. *Atmospheric Environment*, 331, 120613. <https://doi.org/10.1016/j.atmosenv.2024.120613>
- Macatangay, R., Rattanasoon, S., Butterley, T., Bran, S. H., et al. (2024). Seeing and turbulence profile simulations over complex terrain at the Thai National Observatory using a chemistry-coupled regional forecasting model. *Monthly Notices of the Royal Astronomical Society*, 530(2), 1414–1423. <https://doi.org/10.1093/mnras/stae727>

- Bran, S. H., Macatangay, R., Surapipith, V., et al. (2022). *Atmospheric Research*, 277, 106303. <https://doi.org/10.1016/j.atmosres.2022.106303>

These studies demonstrate the model's reliability in capturing air quality dynamics, optical turbulence, and regional transport processes over northern Thailand. Nonetheless, we will revise the manuscript to include a brief discussion confirming the WRF-Chem model's validation status, along with appropriate citations, to clarify its suitability as a reference for comparison in this study (added to the abstract, introduction, methodology, Figure 3 caption, conclusion and references section):

Abstract:

Accurate determination of the planetary boundary layer (PBL) height, mixing layer height (MLH), and aerosol layer top (ALT) is critical for air quality and climate studies, particularly in regions with complex aerosol dynamics such as Chiang Mai, northern Thailand. This study presents a novel LiDAR-based methodology that incorporates a temperature-dependent, dynamic maximum analysis altitude (MAA) to decouple these layers, addressing the limitations of conventional algorithms like the Haar Wavelet Covariance Transform (WCT). Traditional fixed-altitude approaches often misclassify the ALT as the PBL height—especially during nighttime or transition periods—leading to significant overestimations. By dynamically adjusting the MAA based on surface temperature variations, the proposed approach more effectively distinguishes the PBL from residual aerosol layers and cloud interference. Validation using radiosonde data and comparison with WRF-Chem simulations demonstrate strong agreement, with LiDAR-derived PBL heights exhibiting improved diurnal resolution and accuracy. However, model simulations tend to overestimate the PBL height during periods of elevated aerosol loading, underscoring the need for improved aerosol–radiation interaction parameterizations. The WRF-Chem model used in this study has been previously validated for northern Thailand and provides a robust benchmark for PBL comparison. This analysis highlights seasonal variations in agreement metrics and supports the integration of thermodynamic and aerosol observations for enhanced boundary layer characterization. The framework developed here offers a reliable tool for advancing air quality forecasting, pollutant transport analysis, and LiDAR-based remote sensing applications across Southeast Asia.



Introduction (2nd paragraph):

This study focuses on enhancing LiDAR-based boundary layer characterization by refining the detection of PBL height, MLH, and ALT. Traditional algorithms, such as the Haar Wavelet Covariance Transform (WCT), often misclassify the ALT as the PBL height, especially at night or during transitional periods when aerosol gradients are less distinct. Clouds and other atmospheric complexities make these measurements more challenging. By integrating normalized relative backscatter (NRB) profiles with dynamic thermodynamic adjustments, this approach addresses ambiguities in traditional methods and improves the reliability of boundary layer determinations. The novel method developed in this study was validated using radiosonde measurements and compared against WRF-Chem simulations. To support model–observation comparisons, we use a WRF-Chem configuration that has been previously validated under similar regional conditions in northern Thailand for surface pollutant distributions, boundary layer dynamics, and optical turbulence (Bran et al., 2022; Macatangay et al., 2024; Bran et al., 2024), confirming its suitability as a benchmark.

Methodology (end):

The WRF-Chem simulations used in this study have been previously validated under similar regional conditions in northern Thailand. Prior work has demonstrated the model's reliability in capturing key atmospheric dynamics, including surface  $PM_{2.5}$  distributions, optical turbulence, and boundary layer processes. Notably, the model has been successfully applied in the following studies: Bran et al. (2022), Macatangay et al. (2024), and Bran et al. (2024). These validations support the robustness of WRF-Chem for use as a benchmark in our comparison with LiDAR-derived PBL heights.

Figure 3 caption:

Figure 3. Comparison of planetary boundary layer (PBL) height estimates from LiDAR retrievals (red line) and WRF-Chem forecasts (black line) at NARIT AstroPark, Chiang Mai, Thailand, for (a) December 2023, (b) January 2024, and (c) February 2024 (left column). The middle column shows time series of differences between WRF-Chem and LiDAR estimates ( $WRF - LiDAR$ ), while the right column presents scatter plots with correlation coefficients ( $r$ ), root mean square error (RMSE), percentage RMSE (%RMSE), and number of matched data

points (n). The WRF-Chem model configuration used in this comparison has been previously validated under similar regional conditions in northern Thailand, supporting its use as a reference for PBL height estimation.

Conclusion (2nd paragraph):

This study highlights the complexities of aerosol layering and PBL identification in regions with high aerosol loading, such as Chiang Mai, where seasonal forest fires and agricultural burning contribute to significant atmospheric pollution. By enhancing the accuracy of LiDAR-based PBL height estimations, the research provides critical insights for improving air quality modeling and understanding pollutant transport under complex meteorological conditions. The results demonstrate a generally consistent relationship between LiDAR-derived and model-based PBL height estimates, with seasonal variations in agreement metrics. The WRF-Chem model configuration, previously validated over northern Thailand for air quality, turbulence, and PBL structure, continues to perform reliably as a comparison benchmark. These findings support the value of integrating high-resolution LiDAR retrievals with regional models to evaluate boundary layer processes and diagnose modeling uncertainties across different seasons.

References:

Bran, S. H., Macatangay, R., Surapipith, V., Chotamonsak, C., Chantara, S., Han, Z., & Li, J. (2022). Chemical transport modeling of transboundary haze events in northern Thailand. *Atmospheric Research*, 277, 106303. <https://doi.org/10.1016/j.atmosres.2022.106303>

Macatangay, R., Rattanasoon, S., Butterley, T., Bran, S. H., Sonkaew, T., Sukaum, B., Sookjai, D., Panya, M., & Supasri, T. (2024). Seeing and turbulence profile simulations over complex terrain at the Thai National Observatory using a chemistry-coupled regional forecasting model. *Monthly Notices of the Royal Astronomical Society*, 530(2), 1414–1423. <https://doi.org/10.1093/mnras/stae727>

Bran, S. H., Macatangay, R., Chotamonsak, C., Chantara, S., & Surapipith, V. (2024). Understanding the seasonal dynamics of surface PM<sub>2.5</sub> mass distribution and source contributions over Thailand. *Atmospheric Environment*, 331, 120613. <https://doi.org/10.1016/j.atmosenv.2024.120613>
